# Supplementary material for: Defining Success in Measurement-Based Care for Depression: A Comparison of Common Metrics
Source: Atypon-hosted journal article supplement (doi:10.1176/appi.ps.201900295), 2019-12-18

Supplementary Materials, Figures

- p. 11           **Figure S1:** Flow diagram for identifying analytic cohort
- p. 12-13       **Figure S2:** Distribution of baseline PHQ-9 scores for episodes with and without follow-up scores observed at Kaiser Permanente Colorado, KPC, (a) and Kaiser Permanente Washington, KPW, (b).
- p. 14-15       **Figure S3:** Distribution of best and final PHQ-9 scores 14-180 days after treatment initiation for new psychotherapy episodes at KPC (a) and KPW (b)
- p. 16-17       **Figure S4:** Probability of treatment success varying the threshold that defines treatment success, *effect size*, at KPC (a) and KPW (b)
- p. 18-19       **Figure S5:** Probability of treatment success varying the threshold that defines treatment success, *SAES*, at KPC (a) and KPW (b)
- p. 20-21       **Figure S6:** Probability of treatment success varying the threshold that defines treatment success, *response* (or percent improvement), at KPC (a) and KPW (b)

Supplementary Materials, Tables

**Table S1:** Description of treatment episodes follow-up (14-180 days after treatment initiation)

|                                                 | All (n=5,554) | KPC (n=2,559) | KPW (n=2,995) |
|-------------------------------------------------|---------------|---------------|---------------|
| # visits, total                                 | 24,189        | 10,305        | 13,884        |
| Median # (IQR <sup>1</sup> ) visits             | 3 (2, 6)      | 3 (1, 5)      | 3 (2, 6)      |
| Median # (IQR) PHQ-9 scores <sup>2</sup>        | 2 (1, 5)      | 2 (1, 4)      | 3 (1, 5)      |
| # (%) of visits with PHQ-9                      | 19,048 (79%)  | 7,608 (74%)   | 11,440 (82%)  |
| Median (IQR) days since baseline of final visit | 104 (49, 154) | 87 (41, 147)  | 118 (58, 160) |
| Median (IQR) days since baseline of final PHQ-9 | 93 (42, 148)  | 81 (36, 141)  | 104 (49, 154) |
| Mean (sd <sup>3</sup> ) best PHQ-9 score        | 9.6 (5.9)     | 9.4 (6.0)     | 9.7 (5.9)     |
| Mean (sd) final PHQ-9 score                     | 11.0 (6.4)    | 10.8 (6.40)   | 11.3 (6.4)    |
| # (%) best = final PHQ-9 score                  | 3,703 (67%)   | 1,812 (71%)   | 1,891 (63%)   |

<sup>1</sup>IQR: Interquartile range

<sup>2</sup>Some encounters had more than 1 PHQ-9 observations

<sup>3</sup>sd: standard deviation

**Table S2(a-l):** Cross-tabulation of depression treatment outcome measures

**Table S2(a):** KPC Response vs. Remission

|                    | No remission |        |        | Remission |        |       | Total |
|--------------------|--------------|--------|--------|-----------|--------|-------|-------|
|                    | Count        | Row %  | Col %  | Count     | Row %  | Col % |       |
| <b>No response</b> | 1322         | 100%   | 66.70% | 0         | 0%     | 0%    | 1322  |
| <b>Response</b>    | 660          | 53.40% | 33.30% | 577       | 46.60% | 100%  | 1237  |
| <b>Total</b>       | 1982         |        |        | 577       |        |       | 2559  |

**Table S2(b):** KPC Response vs. Effect size  $\geq 0.8$

|  | Effect size < 0.8 |       |       | Effect size $\geq 0.8$ |       |       | Total |
|--|-------------------|-------|-------|------------------------|-------|-------|-------|
|  | Count             | Row % | Col % | Count                  | Row % | Col % |       |

|                    |     |        |      |      |        |        |      |
|--------------------|-----|--------|------|------|--------|--------|------|
| <b>No response</b> | 683 | 51.70% | 100% | 639  | 48.30% | 34.10% | 1322 |
| <b>Response</b>    | 0   | 0%     | 0%   | 1237 | 100%   | 66%    | 1237 |
| <b>Total</b>       | 683 |        |      | 1876 |        |        | 2559 |

**Table S2(c): KPC Response vs. SAES  $\geq$  0.8**

|                    | <b>SAES &lt; 0.8</b> |        |       | <b>SAES <math>\geq</math> 0.8</b> |        |        | <b>Total</b> |
|--------------------|----------------------|--------|-------|-----------------------------------|--------|--------|--------------|
|                    | Count                | Row %  | Col % | Count                             | Row %  | Col %  |              |
| <b>No response</b> | 818                  | 61.90% | 100%  | 504                               | 38.10% | 28.90% | 1322         |
| <b>Response</b>    | 0                    | 0%     | 0%    | 1237                              | 100%   | 71.10% | 1237         |
| <b>Total</b>       | 818                  |        |       | 1741                              |        |        | 2559         |

**Table S2(d): KPC Effect size  $\geq$  0.8 vs. Remission**

|                                          | <b>No remission</b> |        |        | <b>Remission</b> |        |       | <b>Total</b> |
|------------------------------------------|---------------------|--------|--------|------------------|--------|-------|--------------|
|                                          | Count               | Row %  | Col %  | Count            | Row %  | Col % |              |
| <b>Effect size &lt; 0.8</b>              | 683                 | 100%   | 34.50% | 0                | 0%     | 0%    | 683          |
| <b>Effect size <math>\geq</math> 0.8</b> | 1299                | 69.20% | 65.50% | 577              | 30.80% | 100%  | 1876         |
| <b>Total</b>                             | 1982                |        |        | 577              |        |       | 2559         |

**Table S2(e): KPC SAES  $\geq$  0.8 vs. Remission**

|                                   | <b>No remission</b> |        |        | <b>Remission</b> |        |       | <b>Total</b> |
|-----------------------------------|---------------------|--------|--------|------------------|--------|-------|--------------|
|                                   | Count               | Row %  | Col %  | Count            | Row %  | Col % |              |
| <b>SAES &lt; 0.8</b>              | 818                 | 100%   | 41.30% | 0                | 0%     | 0%    | 818          |
| <b>SAES <math>\geq</math> 0.8</b> | 1164                | 66.90% | 58.70% | 577              | 33.10% | 100%  | 1741         |
| <b>Total</b>                      | 1982                |        |        | 577              |        |       | 2559         |

**Table S2(f): KPC SAES  $\geq$  0.8 vs. Effect size  $\geq$  0.8**

|                                   | <b>Effect size &lt; 0.8</b> |        |        | <b>Effect size <math>\geq</math> 0.8</b> |        |        | <b>Total</b> |
|-----------------------------------|-----------------------------|--------|--------|------------------------------------------|--------|--------|--------------|
|                                   | Count                       | Row %  | Col %  | Count                                    | Row %  | Col %  |              |
| <b>SAES &lt; 0.8</b>              | 624                         | 76.30% | 91.40% | 194                                      | 23.70% | 10.30% | 818          |
| <b>SAES <math>\geq</math> 0.8</b> | 59                          | 3.40%  | 8.60%  | 1682                                     | 96.60% | 89.70% | 1741         |

|              |     |  |  |      |  |  |      |
|--------------|-----|--|--|------|--|--|------|
| <b>Total</b> | 683 |  |  | 1876 |  |  | 2559 |
|--------------|-----|--|--|------|--|--|------|

**Table S2(g): KPW Response vs. Remission**

|                    | No remission |       |       | Remission |       |       | Total |
|--------------------|--------------|-------|-------|-----------|-------|-------|-------|
|                    | Count        | Row % | Col % | Count     | Row % | Col % |       |
| <b>No response</b> | 1699         | 1     | 0.717 | 0         | 0     | 0     | 1699  |
| <b>Response</b>    | 670          | 0.517 | 0.283 | 626       | 0.483 | 1     | 1296  |
| <b>Total</b>       | 2369         |       |       | 626       |       |       | 2995  |

**Table S2(h): KPW Response vs. Effect size  $\geq 0.8$**

|                    | Effect size $< 0.8$ |       |       | Effect size $\geq 0.8$ |       |       | Total |
|--------------------|---------------------|-------|-------|------------------------|-------|-------|-------|
|                    | Count               | Row % | Col % | Count                  | Row % | Col % |       |
| <b>No response</b> | 888                 | 0.523 | 1     | 811                    | 0.477 | 0.385 | 1699  |
| <b>Response</b>    | 0                   | 0     | 0     | 1296                   | 1     | 0.615 | 1296  |
| <b>Total</b>       | 888                 |       |       | 2107                   |       |       | 2995  |

**Table S2(i): KPW Response vs. SAES  $\geq 0.8$**

|                    | SAES $< 0.8$ |        |       | SAES $\geq 0.8$ |        |        | Total |
|--------------------|--------------|--------|-------|-----------------|--------|--------|-------|
|                    | Count        | Row %  | Col % | Count           | Row %  | Col %  |       |
| <b>No response</b> | 1049         | 61.70% | 100%  | 650             | 38.30% | 33.40% | 1699  |
| <b>Response</b>    | 0            | 0%     | 0%    | 1296            | 100%   | 67%    | 1296  |
| <b>Total</b>       | 1049         |        |       | 1946            |        |        | 2995  |

**Table S2(j): KPW Effect size  $\geq 0.8$  vs. Remission**

|                                          | No remission |        |        | Remission |        |       | Total |
|------------------------------------------|--------------|--------|--------|-----------|--------|-------|-------|
|                                          | Count        | Row %  | Col %  | Count     | Row %  | Col % |       |
| <b>Effect size <math>&lt; 0.8</math></b> | 888          | 100%   | 37.50% | 0         | 0%     | 0%    | 888   |
| <b>Effect size <math>\geq 0.8</math></b> | 1481         | 70.30% | 62.50% | 626       | 29.70% | 100%  | 2107  |
| <b>Total</b>                             | 2369         |        |        | 626       |        |       | 2995  |



|                                          |       |       |       |       |       |       |        |
|------------------------------------------|-------|-------|-------|-------|-------|-------|--------|
| <b>Effect size <math>\geq 0.8</math></b> | 1.871 | 1.522 | 2.307 | 2.705 | 2.25  | 3.262 | <0.001 |
| <b>SAES <math>\geq 0.8</math></b>        | 0.591 | 0.488 | 0.716 | 0.618 | 0.525 | 0.728 | <0.001 |
| <b>Response</b>                          | 1.092 | 0.914 | 1.304 | 1.044 | 0.892 | 1.221 | 0.544  |
| <b>Remission</b>                         | 0.408 | 0.324 | 0.511 | 0.452 | 0.367 | 0.554 | <0.001 |

**Table S4:** Sensitivity analysis regression using inverse probability of observation weighting to account for loss to follow-up, *best score*

|                                          | <b>OR</b> | <b>95% CI, lower</b> | <b>95% CI, higher</b> | <b>p-value</b> |
|------------------------------------------|-----------|----------------------|-----------------------|----------------|
| <b>Effect size <math>\geq 0.8</math></b> | 2.269     | 2.024                | 2.547                 | <0.001         |
| <b>SAES <math>\geq 0.8</math></b>        | 0.602     | 0.543                | 0.668                 | <0.001         |
| <b>Response</b>                          | 1.066     | 0.967                | 1.176                 | 0.201          |
| <b>Remission</b>                         | 0.429     | 0.378                | 0.487                 | <0.001         |

**Table S5(a-b):** Sensitivity analysis using alternate methods to calculate effect size and severity-adjusted effect size (SAES), *best score*

**Table S5(a):** Effect size

|                                                                       | <b>OR</b> | <b>95% CI, lower</b> | <b>95% CI, higher</b> | <b>p-value</b> |
|-----------------------------------------------------------------------|-----------|----------------------|-----------------------|----------------|
| <b>Effect size <math>\geq 0.8</math>, primary analysis</b>            | 2.306     | 2.01                 | 2.649                 | <0.001         |
| <b>Effect size <math>\geq 0.8</math>, all baseline SD<sup>1</sup></b> | 2.306     | 2.01                 | 2.649                 | <0.001         |
| <b>Effect size <math>\geq 0.8</math>, difference SD<sup>2</sup></b>   | 2.585     | 2.267                | 2.952                 | <0.001         |

<sup>1</sup> Effect size calculated using all baseline PHQ-9 scores from eligible episodes (including those without follow-up PHQ-9) to calculate standard deviation (SD).

<sup>2</sup> Effect size calculated using the standard deviation of the differences between best follow-up and baseline PHQ-9 score

**Table S5(b):** SAES

|  | <b>OR</b> | <b>95% CI, lower</b> | <b>95% CI, higher</b> | <b>p-value</b> |
|--|-----------|----------------------|-----------------------|----------------|
|--|-----------|----------------------|-----------------------|----------------|

|                                     |       |       |       |        |
|-------------------------------------|-------|-------|-------|--------|
| <b>SAES ≥ 0.8, primary analysis</b> | 0.602 | 0.543 | 0.668 | <0.001 |
| <b>SAES ≥ 0.8, IPW<sup>1</sup></b>  | 0.602 | 0.543 | 0.668 | <0.001 |

<sup>1</sup> SAES calculates using inverse probability weighting (IPW) accounting for loss to follow-up for linear regression of expected best follow-up score given baseline

**Table S6(a-c):** Association between baseline PHQ-9 score and probability of treatment success varying the threshold that defines treatment success, *best* score

**Table S6(a):** Effect size

|                                            | <b>OR</b> | <b>95% CI, lower</b> | <b>95% CI, higher</b> | <b>p-value</b> |
|--------------------------------------------|-----------|----------------------|-----------------------|----------------|
| <b>Effect size ≥ 0.6</b>                   | 2.387     | 2.056                | 2.776                 | <0.001         |
| <b>Effect size ≥ 0.8, primary analysis</b> | 2.306     | 2.01                 | 2.649                 | <0.001         |
| <b>Effect size ≥ 1</b>                     | 2.603     | 2.282                | 2.973                 | <0.001         |
| <b>Effect size ≥ 1.2</b>                   | 2.912     | 2.563                | 3.312                 | <0.001         |

**Table S6(b):** SAES

|                                     | <b>OR</b> | <b>95% CI, lower</b> | <b>95% CI, higher</b> | <b>p-value</b> |
|-------------------------------------|-----------|----------------------|-----------------------|----------------|
| <b>SAES ≥ 0.6</b>                   | 0.537     | 0.471                | 0.613                 | <0.001         |
| <b>SAES ≥ 0.8, primary analysis</b> | 0.607     | 0.536                | 0.687                 | <0.001         |
| <b>SAES ≥ 1</b>                     | 0.709     | 0.629                | 0.799                 | <0.001         |
| <b>SAES ≥ 1.2</b>                   | 0.826     | 0.734                | 0.928                 | 0.001          |

**Table S6(c):** Response

|                                            | <b>OR</b> | <b>95% CI, lower</b> | <b>95% CI, higher</b> | <b>p-value</b> |
|--------------------------------------------|-----------|----------------------|-----------------------|----------------|
| <b>≥ 25% improvement</b>                   | 1.22      | 1.073                | 1.388                 | 0.002          |
| <b>≥ 40% improvement</b>                   | 1.058     | 0.941                | 1.191                 | 0.346          |
| <b>≥ 50% improvement, primary analysis</b> | 1.064     | 0.946                | 1.197                 | 0.299          |
| <b>≥ 60% improvement</b>                   | 1.143     | 1.01                 | 1.294                 | 0.034          |

|                          |       |       |       |       |
|--------------------------|-------|-------|-------|-------|
| <b>≥ 75% improvement</b> | 1.199 | 1.033 | 1.392 | 0.017 |
|--------------------------|-------|-------|-------|-------|

**Table S7:** Depression treatment outcomes, final PHQ-9 score

|                          | <b>All (n= 5,554)</b> | <b>KPC (n= 2,559)</b> | <b>KPW (n= 2,995)</b> |
|--------------------------|-----------------------|-----------------------|-----------------------|
| <b>Effect size ≥ 0.8</b> | 3,414 (61%)           | 1,638 (64%)           | 1,776 (59%)           |
| <b>SAES ≥ 0.8</b>        | 2,545 (46%)           | 1,298 (68%)           | 1,247 (42%)           |
| <b>Response</b>          | 2,026 (36%)           | 1,016 (40%)           | 1,010 (34%)           |
| <b>Remission</b>         | 923 (17%)             | 440 (17%)             | 483 (16%)             |

**Table S8(a-b):** Association between baseline PHQ-9 score and probability of treatment success, *final* PHQ-9 score

**Table S8(a):** Primary analysis, additive adjustment for site

|                          | <b>OR<sup>1</sup></b> | <b>95% CI<sup>2</sup>, lower</b> | <b>95% CI, higher</b> | <b>p-value</b> |
|--------------------------|-----------------------|----------------------------------|-----------------------|----------------|
| <b>Effect size ≥ 0.8</b> | 2.158                 | 1.904                            | 2.448                 | <0.001         |
| <b>SAES ≥ 0.8</b>        | 0.785                 | 0.698                            | 0.884                 | <0.001         |
| <b>Response</b>          | 1.085                 | 0.961                            | 1.225                 | 0.189          |
| <b>Remission</b>         | 0.451                 | 0.381                            | 0.534                 | <0.001         |

**Table S8(b):** Interaction between site and probability of success

|                          | <b>KPC</b> |                      |                       | <b>KPW</b> |                      |                       | <b>p-value, interaction</b> |
|--------------------------|------------|----------------------|-----------------------|------------|----------------------|-----------------------|-----------------------------|
|                          | <b>OR</b>  | <b>95% CI, lower</b> | <b>95% CI, higher</b> | <b>OR</b>  | <b>95% CI, lower</b> | <b>95% CI, higher</b> |                             |
| <b>Effect size ≥ 0.8</b> | 1.949      | 1.611                | 2.361                 | 2.329      | 1.973                | 2.754                 | <0.001                      |
| <b>SAES ≥ 0.8</b>        | 0.764      | 0.639                | 0.913                 | 0.803      | 0.685                | 0.941                 | <0.001                      |
| <b>Response</b>          | 1.233      | 1.029                | 1.479                 | 0.977      | 0.828                | 1.151                 | 0.074                       |
| <b>Remission</b>         | 0.458      | 0.356                | 0.586                 | 0.446      | 0.354                | 0.56                  | <0.001                      |



**Table S9:** Sensitivity analysis regression using inverse probability of observation weighting to account for loss to follow-up, *final* score

|                                          | <b>OR</b> | <b>95% CI, lower</b> | <b>95% CI, higher</b> | <b>p-value</b> |
|------------------------------------------|-----------|----------------------|-----------------------|----------------|
| <b>Effect size <math>\geq 0.8</math></b> | 2.15      | 1.937                | 2.389                 | <0.001         |
| <b>SAES <math>\geq 0.8</math></b>        | 0.785     | 0.711                | 0.867                 | <0.001         |
| <b>Response</b>                          | 1.097     | 0.991                | 1.214                 | 0.073          |
| <b>Remission</b>                         | 0.452     | 0.393                | 0.52                  | <0.001         |

**Table S10(a-b):** Sensitivity analysis using alternate methods to calculate effect size and severity-adjusted effect size (SAES), *final* score

**Table S10(a):** Effect size

|                                                                       | <b>OR</b> | <b>95% CI, lower</b> | <b>95% CI, higher</b> | <b>p-value</b> |
|-----------------------------------------------------------------------|-----------|----------------------|-----------------------|----------------|
| <b>Effect size <math>\geq 0.8</math>, primary analysis</b>            | 2.158     | 1.904                | 2.448                 | <0.001         |
| <b>Effect size <math>\geq 0.8</math>, all baseline SD<sup>1</sup></b> | 2.158     | 1.904                | 2.448                 | <0.001         |
| <b>Effect size <math>\geq 0.8</math>, difference SD<sup>2</sup></b>   | 2.555     | 2.261                | 2.889                 | <0.001         |

<sup>1</sup> Effect size calculated using all baseline PHQ-9 scores from eligible episodes (including those without follow-up PHQ-9) to calculate standard deviation (SD).

<sup>2</sup> Effect size calculated using the standard deviation of the differences between final follow-up and baseline PHQ-9 score

**Table S10(b):** SAES

|                                                     | <b>OR</b> | <b>95% CI, lower</b> | <b>95% CI, higher</b> | <b>p-value</b> |
|-----------------------------------------------------|-----------|----------------------|-----------------------|----------------|
| <b>SAES <math>\geq 0.8</math>, primary analysis</b> | 0.785     | 0.711                | 0.867                 | <0.001         |
| <b>SAES <math>\geq 0.8</math>, IPW<sup>1</sup></b>  | 0.788     | 0.714                | 0.869                 | <0.001         |

<sup>1</sup> SAES calculates using inverse probability weighting (IPW) accounting for loss to follow-up for linear regression of expected final follow-up score given baseline

**Table S11(a-c):** Association between baseline PHQ-9 score and probability of treatment success varying the threshold that defines treatment success, *final* score

**Table S11(a):** Effect size

|                                                            | <b>OR</b> | <b>95% CI, lower</b> | <b>95% CI, higher</b> | <b>p-value</b> |
|------------------------------------------------------------|-----------|----------------------|-----------------------|----------------|
| <b>Effect size <math>\geq 0.6</math></b>                   | 2.115     | 1.857                | 2.413                 | <0.001         |
| <b>Effect size <math>\geq 0.8</math>, primary analysis</b> | 2.158     | 1.904                | 2.448                 | <0.001         |
| <b>Effect size <math>\geq 1</math></b>                     | 2.316     | 2.049                | 2.62                  | <0.001         |
| <b>Effect size <math>\geq 1.2</math></b>                   | 2.565     | 2.27                 | 2.9                   | <0.001         |

**Table S11(b):** SAES

|                                                     | <b>OR</b> | <b>95% CI, lower</b> | <b>95% CI, higher</b> | <b>p-value</b> |
|-----------------------------------------------------|-----------|----------------------|-----------------------|----------------|
| <b>SAES <math>\geq 0.6</math></b>                   | 0.675     | 0.6                  | 0.76                  | <0.001         |
| <b>SAES <math>\geq 0.8</math>, primary analysis</b> | 0.785     | 0.698                | 0.884                 | <0.001         |
| <b>SAES <math>\geq 1</math></b>                     | 0.952     | 0.843                | 1.074                 | 0.422          |
| <b>SAES <math>\geq 1.2</math></b>                   | 1.215     | 1.07                 | 1.378                 | 0.003          |

**Table S11(c):** Response

|                                                             | <b>OR</b> | <b>95% CI, lower</b> | <b>95% CI, higher</b> | <b>p-value</b> |
|-------------------------------------------------------------|-----------|----------------------|-----------------------|----------------|
| <b><math>\geq 25\%</math> improvement</b>                   | 1.159     | 1.028                | 1.306                 | 0.016          |
| <b><math>\geq 40\%</math> improvement</b>                   | 1.071     | 0.952                | 1.205                 | 0.256          |
| <b><math>\geq 50\%</math> improvement, primary analysis</b> | 1.085     | 0.961                | 1.225                 | 0.189          |
| <b><math>\geq 60\%</math> improvement</b>                   | 1.175     | 1.03                 | 1.34                  | 0.017          |
| <b><math>\geq 75\%</math> improvement</b>                   | 1.254     | 1.061                | 1.481                 | 0.008          |

**Figure S1:** Flow diagram for identifying analytic cohort

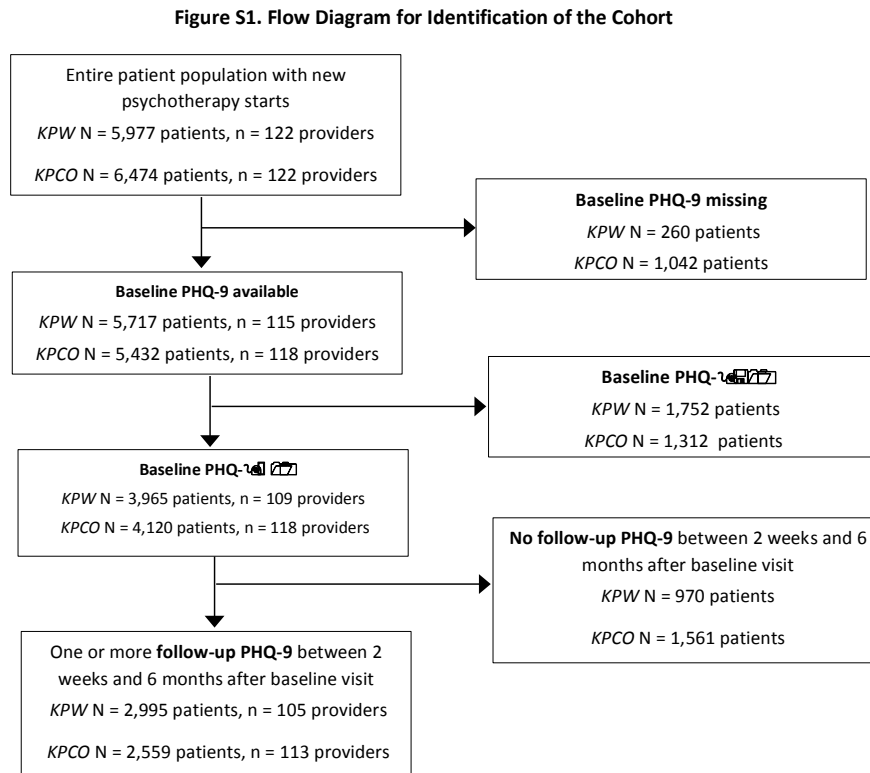

**Figure S2:** Distribution of baseline PHQ-9 scores for episodes with and without follow-up scores observed at Kaiser Permanente Colorado, KPC, (a) and Kaiser Permanente Washington, KPW, (b).

Figure S2(a) KPC

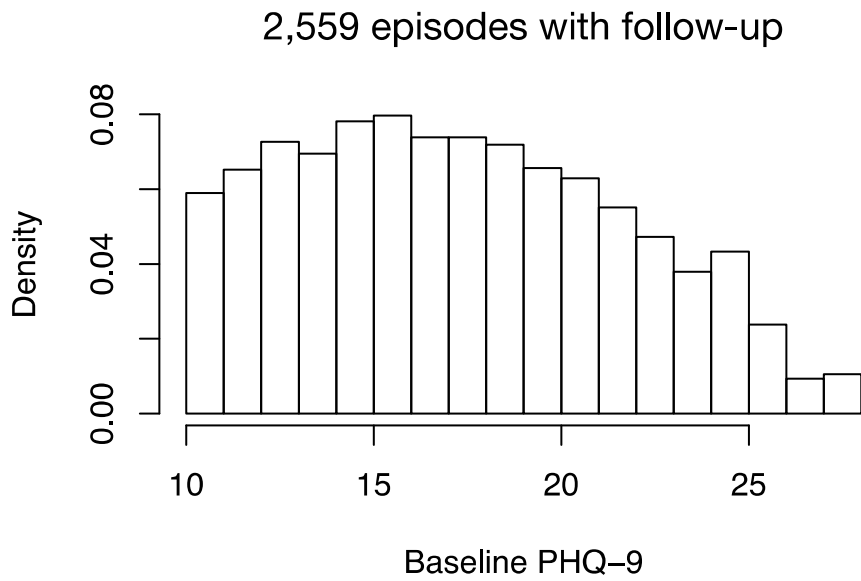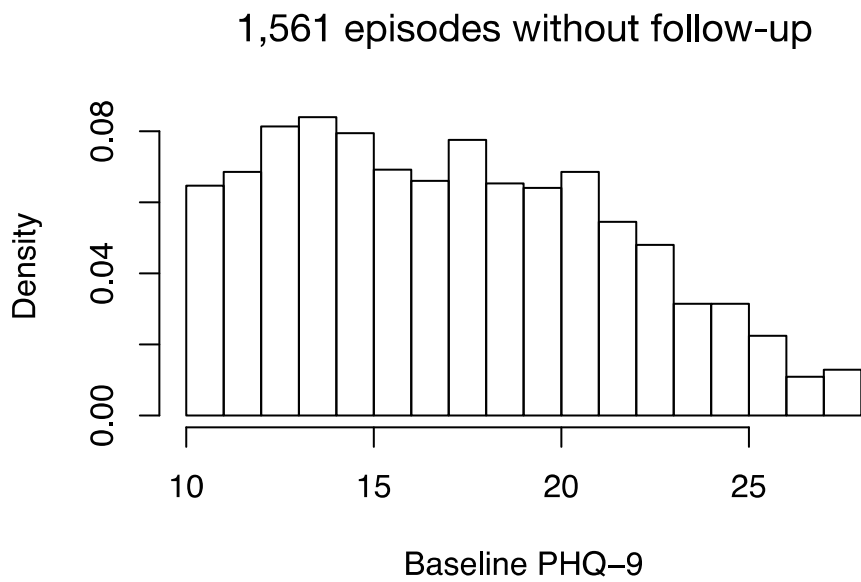

Figure S2(b) KPW

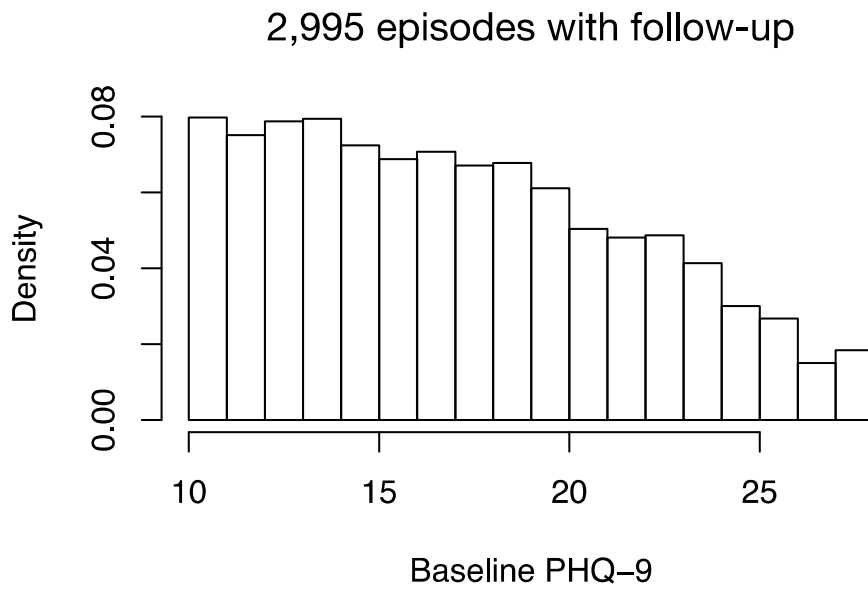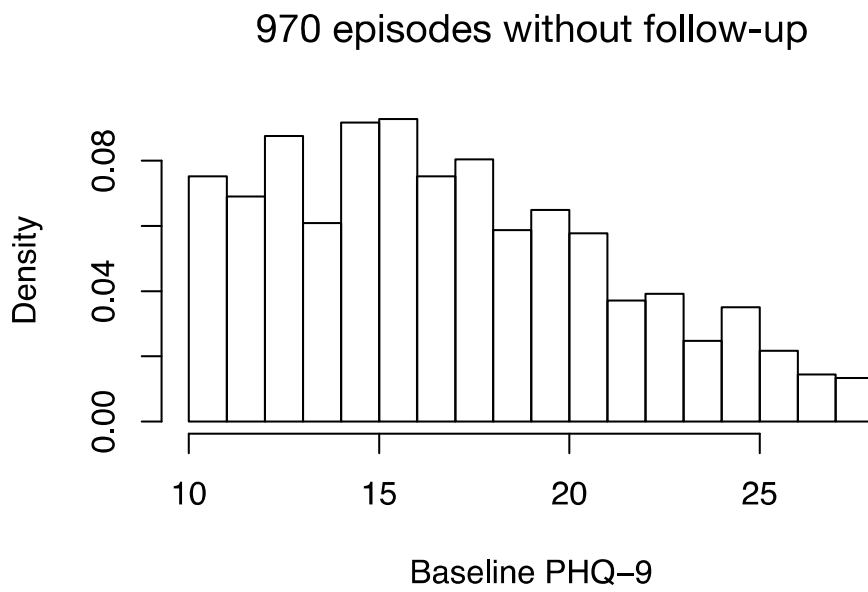

**Figure S3:** Distribution of best and final PHQ-9 scores 14-180 days after treatment initiation for new psychotherapy episodes at KPC (a) and KPW (b)

Figure S3(a) KPC

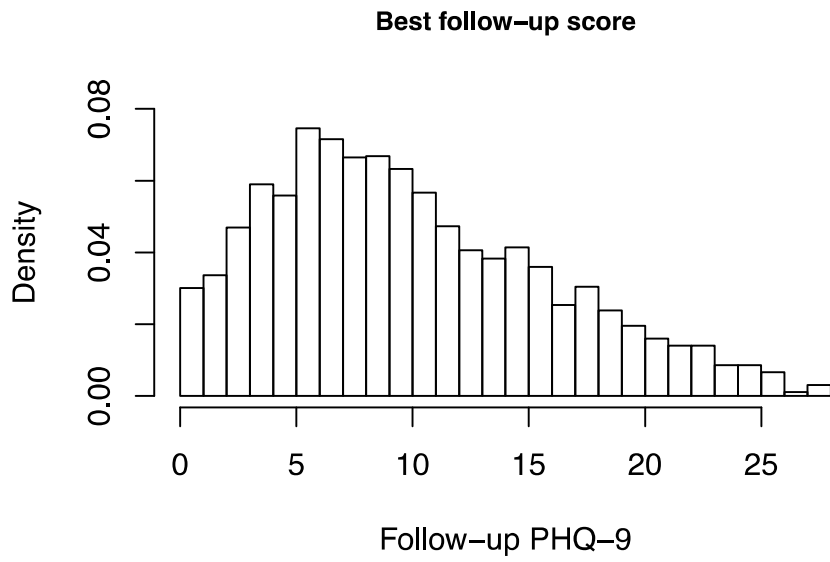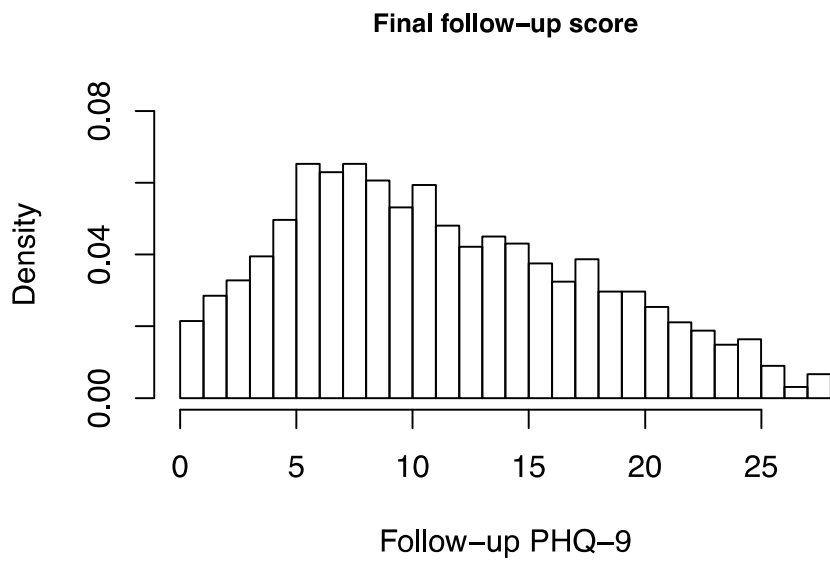

Figure S(b) KPW

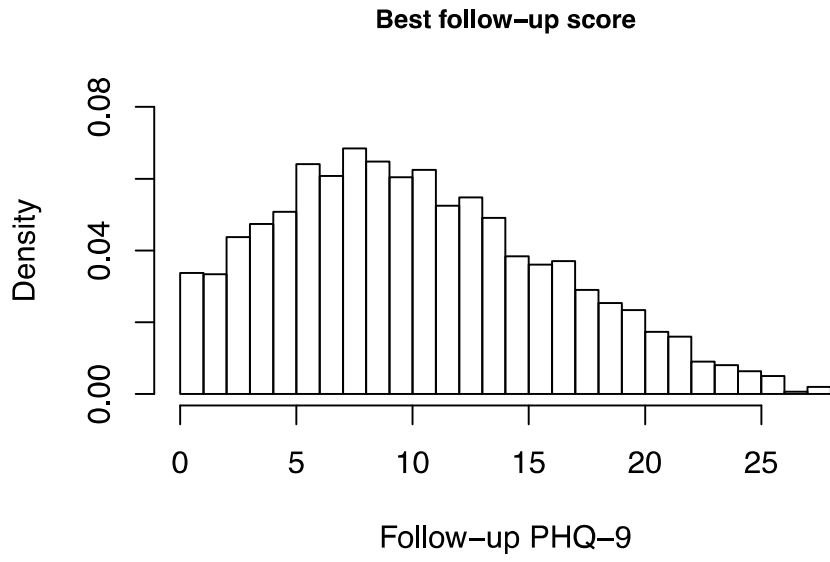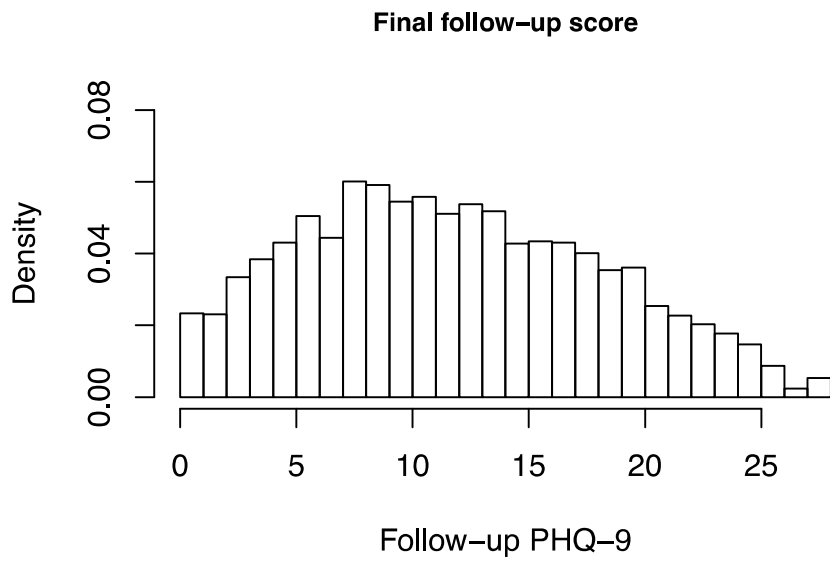

**Figure S4:** Probability of treatment success varying the threshold that defines treatment success, *effect size*, at KPC (a) and KPW (b)

Figure S4(a) KPC

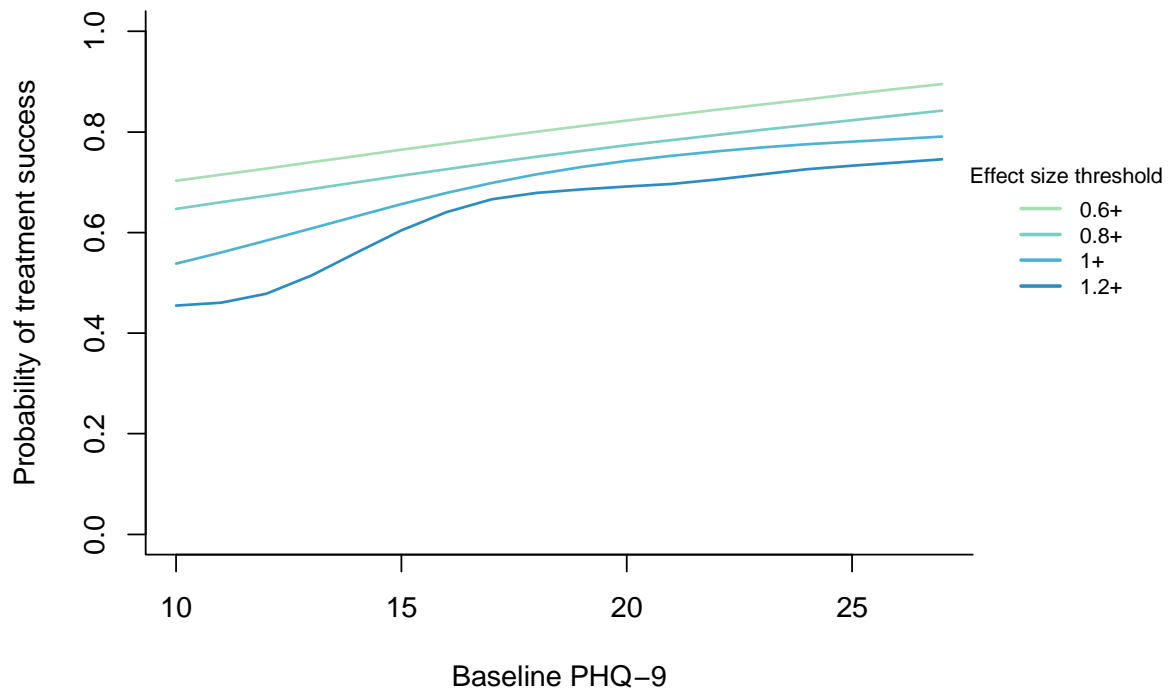



Figure S4(b)

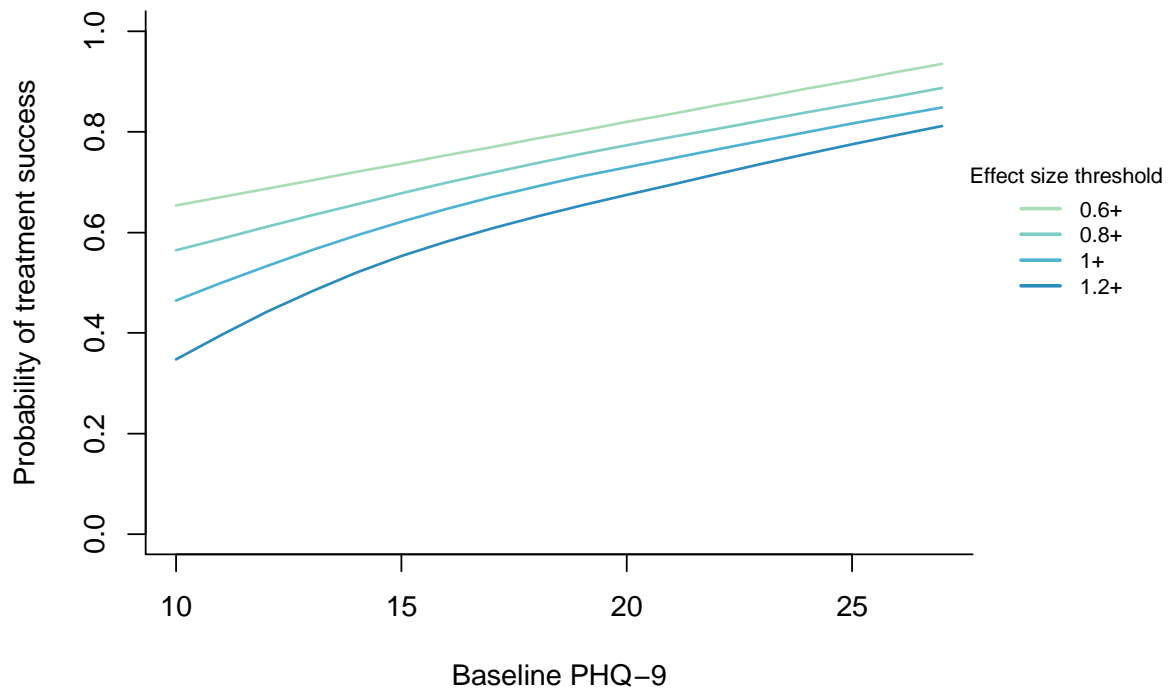

**Figure S5:** Probability of treatment success varying the threshold that defines treatment success, SAES, at KPC (a) and KPW (b)

Figure S5(a) KPC

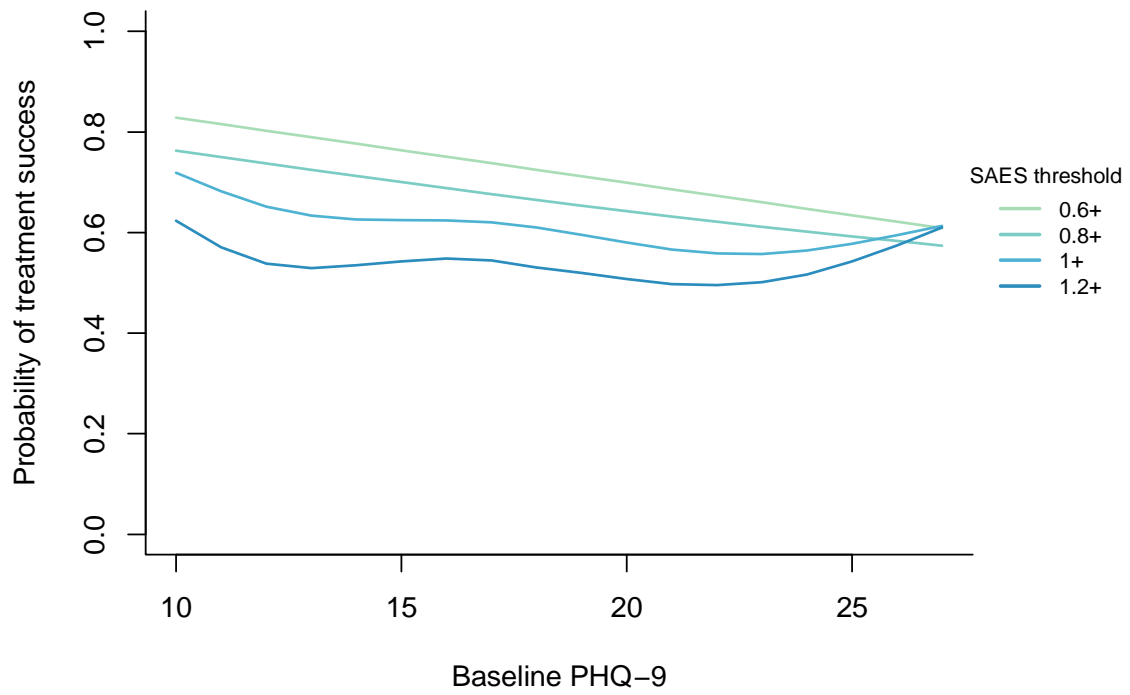

Figure S5(b) KPW

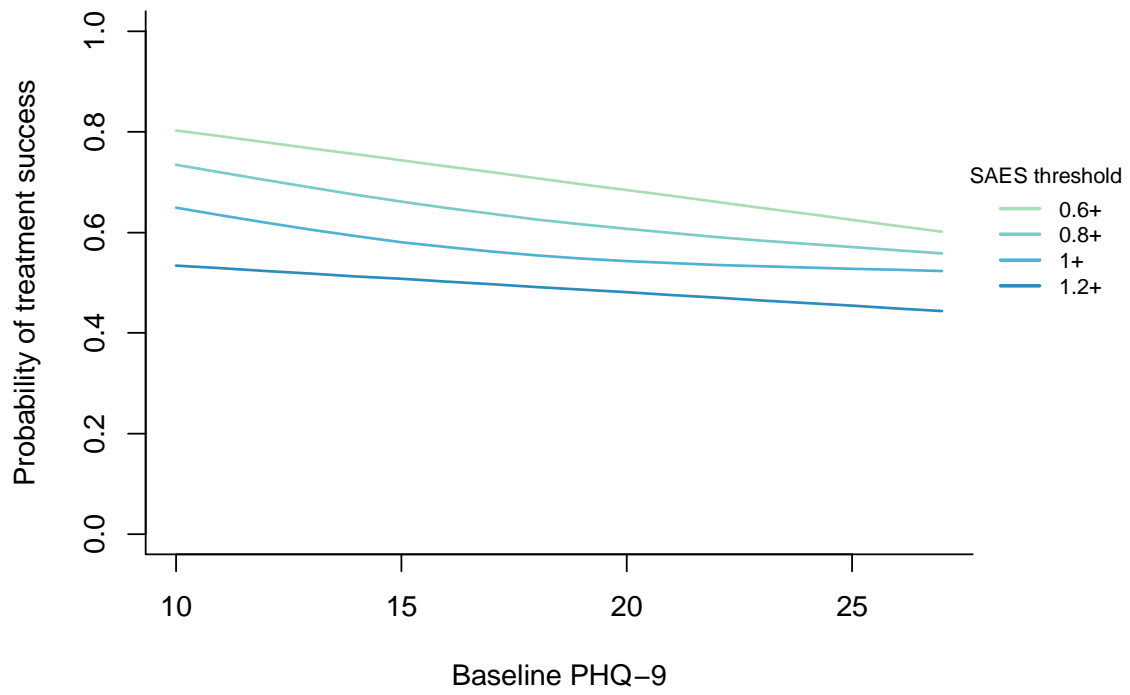

**Figure S6:** Probability of treatment success varying the threshold that defines treatment success, *response* (or percent improvement), at KPC (a) and KPW (b)

Figure S6(a) KPC

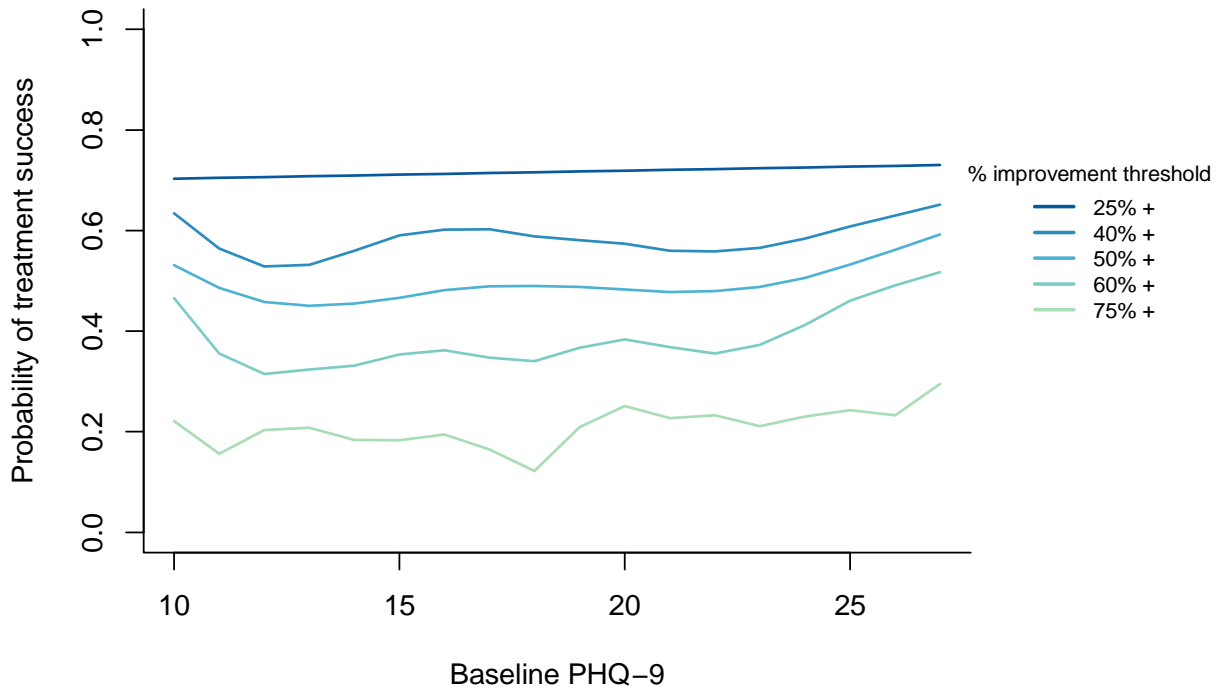

Figure S6(b)

KPW

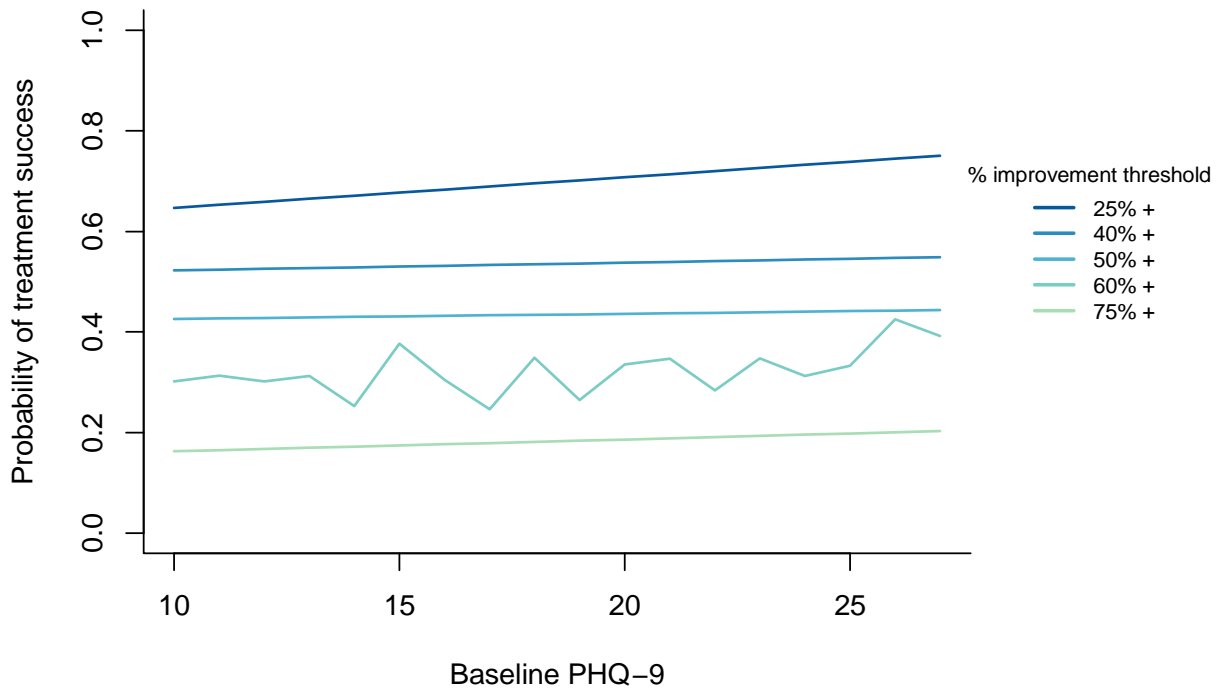

Supplement: appi.ps.201900295.ds001.pdf [file appi.ps.201900295.ds001.pdf]
